# Table of Contents

## EDITORIAL INTRODUCTION

**Issues in Neuroscience Education: Making Connections**  
 Kimberly D. Tanner .....85

## FEATURES

**From Faculty for Undergraduate Neuroscience: Encouraging Innovation in Undergraduate Neuroscience Education by Supporting Student Research and Faculty Development**  
 Jean C. Hardwick, Michael Kerchner, Barbara Lom, Julio J. Ramirez, and Eric P. Wiertelak .....86–90

**Strategy for Engaging the Society for Neuroscience in Science Education**  
 William E. Cameron and Colleen D. McNerney .....91–93

**WWW: Neuroscience Web Sites**  
 Dennis Liu .....94–98

**Video Views and Reviews: Neurulation and the Fashioning of the Vertebrate Central Nervous System**  
 Christopher Watters .....99–103

**Points of View: On the Implications of Neuroscience Research for Science Teaching and Learning: Are There Any? A Skeptical Theme and Variations: The Primacy of Psychology in the Science of Learning**  
 John T. Bruer .....104–110

**Points of View: On the Implications of Neuroscience Research for Science Teaching and Learning: Are There Any?**  
 Anton E. Lawson .....111–117

**BrainLink: A Review of a Model Curriculum Integrating Science, Reading, and Cooperative Learning Groups for Middle School Students**  
 Carrie MacNabb .....118–122

**Learning the Hard Way**  
 David G. Wells, Michael McEvoy, and Mitchell Kundel .....123–125

**A New Formula for Better Learning: A Cup of Common Sense and a Dash of Neuroscience?**  
 Andrea M. Zardetto-Smith .....126–127

## ARTICLES

**Neuroscience Workshops for Fifth-Grade School Children by Undergraduate Students: A University–School Partnership**  
 Judith G. Foy, Marissa Feldman, Edward Lin, Margaret Mahoney, and Chelsea Sjoblom .....128–136

**An Online, Interactive Approach to Teaching Neuroscience to Adolescents**  
 Leslie Miller, Janette Moreno, Irmgard Willcockson, Donna Smith, and Janice Mayes .....137–143

**Neuroscience in Middle Schools: A Professional Development and Resource Program That Models Inquiry-based Strategies and Engages Teachers in Classroom Implementation**  
 Carrie MacNabb, Lee Schmitt, Michael Michlin, Ilene Harris, Larry Thomas, David Chittendon, Timothy J. Ebner, and Janet M. Dubinsky .....144–157

**Brains Rule!: A Model Program for Developing Professional Stewardship among Neuroscientists**  
 Andrea M. Zardetto-Smith, Keli Mu, Laura L. Carruth, and Kyle J. Frantz .....158–166

**Using Literature and Innovative Assessments to Ignite Interest and Cultivate Critical Thinking Skills in an Undergraduate Neuroscience Course**  
 Eileen Lynd-Balta .....167–174

**Routes to Research for Novice Undergraduate Neuroscientists**  
 Kyle J. Frantz, Robert L. DeHaan, Melissa K. Demetrikopoulos, and Laura L. Carruth .....175–187

**Development of a Neuroscience-oriented “Methods” Course for Graduate Students of Pharmacology and Toxicology**  
 Christopher K. Surratt, Paula A. Witt-Enderby, David A. Johnson, Carl A. Anderson, J. Douglas Bricker, Vicki L. Davis, Steven M. Firestone, and Wilson S. Meng .....188–196

### *On the Cover*

Highlighting the focus of this special issue on neuroscience education, the cover features images of a human brain and three types of neurons, all courtesy of contributing authors. Top, this glowing brain is an enhanced image of a human right cerebral hemisphere (David Wells, Yale University). Bottom left, green fluorescent protein (GFP) expressed in a rat hippocampal neuron grown in cell culture gives this neuron its green glow. In the background are neurons, not expressing GFP, that are forming synapses with this hippocampal neuron (David Wells, Yale University). Bottom middle, the Golgi-Cox stain was used to visualize the morphology of cells in the hippocampal formation in a human brain specimen procured during surgery from a patient suffering from intractable temporal lobe epilepsy (Eileen Lynd-Balta, St. John Fisher College). Bottom right, this Purkinje neuron from the cerebellum of a mouse was filled with a dye called lucifer yellow, revealing its elaborate dendritic structure (David Wells, Yale University).

*A goal of CBE is to stimulate dialogue; therefore, readers are invited to submit comments on these articles to [cbe@ascb.org](mailto:cbe@ascb.org).*
